# Supplementary material for: The Role of Electrocardiographic Markers for Predicting Atrial Fibrillation in Patients with Acute Ischemic Stroke: Data from the BIOSIGNAL Cohort Study
Source: MDPI journal article supplement (doi:10.3390/jcm12216830), 2023-10-29
Supplement: s1 [file s1]

## Supplements

The data presented in this study are available on request from the corresponding author. The data are not publicly available due to ethical reasons.

**Table S1: multivariable regression models with PR-Interval lead II**

| Univariable Analysis     |      |              |
|--------------------------|------|--------------|
| Variables                | OR   | 95%-CI       |
| PR-Interval lead II (ms) | 1.01 | 1.00 – 1.01  |
| Adjusted OR Model 1      |      |              |
| PR-Interval lead II (ms) | 1.00 | 1.00 – 1.04  |
| AS5F per points          | 1.02 | 1.00 – 1.04  |
| logMR-proANP (pmol/l)    | 6.63 | 2.67 – 16.42 |
| Adjusted OR Model 2†     |      |              |
| PR-Interval lead II (ms) | 1.00 | 1.00 – 1.01  |
| AS5F per points          | 1.01 | 1.00 – 1.04  |
| logMR-proANP (pmol/l)    | 5.70 | 2.28 – 14.25 |
| LAESD per cm             | 1.54 | 1.01 – 2.35  |
| Large vessel stroke      | 0.15 | 0.05 – 0.41  |

† Due to missing data, we performed multiple Imputation

**Table S2: univariable regression analysis with logP-terminal force as dependent variable and NDAF as independent variable.** logPTFV1 did not show a significant association with NDAF in univariable regression analysis with a narrow CI, and therefore no further analysis was performed.

| Univariable Analysis                                                 |      |             |
|----------------------------------------------------------------------|------|-------------|
| Variable                                                             | OR   | 95%-CI      |
| logP-terminal force<br>in lead V1 ( $\mu\text{V} \times \text{ms}$ ) | 1.00 | 1.00 – 1.00 |

Table S3

STROBE Statement—checklist of items that should be included in reports of observational studies

|                          | Item No | Recommendation                                                                                                                                                                       | Page No |
|--------------------------|---------|--------------------------------------------------------------------------------------------------------------------------------------------------------------------------------------|---------|
| Title and abstract       | 1       | (a) Indicate the study’s design with a commonly used term in the title or the abstract                                                                                               | 1       |
|                          |         | (b) Provide in the abstract an informative and balanced summary of what was done and what was found                                                                                  | 1       |
| Introduction             |         |                                                                                                                                                                                      |         |
| Background/rationale     | 2       | Explain the scientific background and rationale for the investigation being reported                                                                                                 | 1, 2    |
| Objectives               | 3       | State specific objectives, including any prespecified hypotheses                                                                                                                     | 2       |
| Methods                  |         |                                                                                                                                                                                      |         |
| Study design             | 4       | Present key elements of study design early in the paper                                                                                                                              | 2       |
| Setting                  | 5       | Describe the setting, locations, and relevant dates, including periods of recruitment, exposure, follow-up, and data collection                                                      | 2-5     |
| Participants             | 6       | (a) Cohort study—Give the eligibility criteria, and the sources and methods of selection of participants. Describe methods of follow-up                                              | 2-6     |
|                          |         | Case-control study—Give the eligibility criteria, and the sources and methods of case ascertainment and control selection. Give the rationale for the choice of cases and controls   |         |
|                          |         | Cross-sectional study—Give the eligibility criteria, and the sources and methods of selection of participants                                                                        |         |
|                          |         | (b) Cohort study—For matched studies, give matching criteria and number of exposed and unexposed                                                                                     | N/A     |
|                          |         | Case-control study—For matched studies, give matching criteria and the number of controls per case                                                                                   |         |
| Variables                | 7       | Clearly define all outcomes, exposures, predictors, potential confounders, and effect modifiers. Give diagnostic criteria, if applicable                                             | 2 - 10  |
| Data sources/measurement | 8*      | For each variable of interest, give sources of data and details of methods of assessment (measurement). Describe comparability of assessment methods if there is more than one group | 2 - 10  |

|                        |    |                                                                                                                                                                                                                                                                                                                   |         |
|------------------------|----|-------------------------------------------------------------------------------------------------------------------------------------------------------------------------------------------------------------------------------------------------------------------------------------------------------------------|---------|
| Bias                   | 9  | Describe any efforts to address potential sources of bias                                                                                                                                                                                                                                                         | 9       |
| Study size             | 10 | Explain how the study size was arrived at                                                                                                                                                                                                                                                                         | 5, 7    |
| Quantitative variables | 11 | Explain how quantitative variables were handled in the analyses. If applicable, describe which groupings were chosen and why                                                                                                                                                                                      | 6       |
| Statistical methods    | 12 | (a) Describe all statistical methods, including those used to control for confounding                                                                                                                                                                                                                             | 2 - 7   |
|                        |    | (b) Describe any methods used to examine subgroups and interactions                                                                                                                                                                                                                                               | N/A     |
|                        |    | (c) Explain how missing data were addressed                                                                                                                                                                                                                                                                       | 1, 6    |
|                        |    | (d) <i>Cohort study</i> —If applicable, explain how loss to follow-up was addressed<br><br><i>Case-control study</i> —If applicable, explain how matching of cases and controls was addressed<br><br><i>Cross-sectional study</i> —If applicable, describe analytical methods taking account of sampling strategy | N/A     |
|                        |    | (e) Describe any sensitivity analyses                                                                                                                                                                                                                                                                             | 1, 6, 7 |
